# Supplementary material
Source: publisher figshare collection journal article supplement (https://karger.figshare.com/ndownloader/files/17602790)
Supplement: Supplementary file 1 [file 17602790]

Supplement table1

|  | | Physical abuse | | |  | Psychological abuse | | |  | Financial abuse | | |  | Any types of abuse | | |
| --- | --- | --- | --- | --- | --- | --- | --- | --- | --- | --- | --- | --- | --- | --- | --- | --- |
| OR | 95% CI | |  | OR | 95% CI | |  | OR | 95% CI | |  | OR | 95% CI | |
| Sex | |  |  |  |  |  |  |  |  |  |  |  |  |  |  |  |
|  | Male | 1.00 |  |  |  | 1.00 |  |  |  | 1.00 |  |  |  | 1.00 |  |  |
|  | Female | 2.77 | 2.16 | 3.55 |  | 1.54 | 1.42 | 1.67 |  | 0.43 | 0.34 | 0.54 |  | 1.41 | 1.31 | 1.53 |
| Age group | |  |  |  |  |  |  |  |  |  |  |  |  |  |  |  |
|  | 65-69 | 1.00 |  |  |  | 1.00 |  |  |  | 1.00 |  |  |  | 1.00 |  |  |
|  | 70-74 | 1.15 | 0.87 | 1.53 |  | 0.95 | 0.86 | 1.05 |  | 1.04 | 0.79 | 1.37 |  | 0.95 | 0.86 | 1.04 |
|  | 75-79 | 0.95 | 0.69 | 1.31 |  | 0.88 | 0.79 | 0.98 |  | 1.21 | 0.91 | 1.61 |  | 0.91 | 0.82 | 1.01 |
|  | 80-84 | 1.03 | 0.70 | 1.51 |  | 0.74 | 0.65 | 0.85 |  | 0.79 | 0.54 | 1.16 |  | 0.73 | 0.64 | 0.84 |
|  | ≧85 | 0.45 | 0.22 | 0.92 |  | 0.72 | 0.59 | 0.87 |  | 1.14 | 0.73 | 1.80 |  | 0.74 | 0.61 | 0.89 |
| Education level | |  |  |  |  |  |  |  |  |  |  |  |  |  |  |  |
|  | ≦9 | 1.00 |  |  |  | 1.00 |  |  |  | 1.00 |  |  |  | 1.00 |  |  |
|  | ≧10 | 0.80 | 0.64 | 1.00 |  | 1.02 | 0.94 | 1.10 |  | 0.85 | 0.69 | 1.05 |  | 0.99 | 0.92 | 1.07 |
| Equivalent income | |  |  |  |  |  |  |  |  |  |  |  |  |  |  |  |
|  | Low (≦199) | 1.00 |  |  |  | 1.00 |  |  |  | 1.00 |  |  |  | 1.00 |  |  |
|  | Mid (200-399) | 0.67 | 0.51 | 0.89 |  | 0.91 | 0.83 | 1.00 |  | 0.68 | 0.53 | 0.87 |  | 0.88 | 0.81 | 0.96 |
|  | High (≧400) | 0.71 | 0.45 | 1.12 |  | 0.90 | 0.78 | 1.05 |  | 0.50 | 0.31 | 0.78 |  | 0.86 | 0.75 | 0.99 |
| Marital status | |  |  |  |  |  |  |  |  |  |  |  |  |  |  |  |
|  | Married | 1.00 |  |  |  | 1.00 |  |  |  | 1.00 |  |  |  | 1.00 |  |  |
|  | Widowed | 0.45 | 0.30 | 0.66 |  | 0.70 | 0.61 | 0.79 |  | 0.85 | 0.59 | 1.22 |  | 0.72 | 0.63 | 0.81 |
|  | Separated | 0.74 | 0.35 | 1.56 |  | 0.95 | 0.74 | 1.22 |  | 0.91 | 0.46 | 1.79 |  | 0.95 | 0.75 | 1.21 |
|  | Unmarried | 1.03 | 0.47 | 2.27 |  | 0.90 | 0.67 | 1.21 |  | 0.91 | 0.42 | 1.96 |  | 0.96 | 0.73 | 1.25 |
| Living arrangement | |  |  |  |  |  |  |  |  |  |  |  |  |  |  |  |
|  | Living alone | 1.00 |  |  |  | 1.00 |  |  |  | 1.00 |  |  |  | 1.00 |  |  |
|  | With family members | 2.16 | 1.25 | 3.74 |  | 2.26 | 1.86 | 2.75 |  | 1.18 | 0.76 | 1.84 |  | 2.15 | 1.80 | 2.58 |
|  | Other facilities | 2.67 | 1.43 | 5.01 |  | 2.26 | 1.78 | 2.87 |  | 1.17 | 0.67 | 2.05 |  | 2.15 | 1.72 | 2.69 |
| Necessity of daily support | |  |  |  |  |  |  |  |  |  |  |  |  |  |  |  |
|  | Unnecessary | 1.00 |  |  |  | 1.00 |  |  |  | 1.00 |  |  |  | 1.00 |  |  |
|  | Necessary | 2.04 | 1.30 | 3.19 |  | 1.22 | 1.00 | 1.49 |  | 1.35 | 0.83 | 2.20 |  | 1.26 | 1.04 | 1.53 |
| Self-rated health | |  |  |  |  |  |  |  |  |  |  |  |  |  |  |  |
|  | Very good | 1.00 |  |  |  | 1.00 |  |  |  | 1.00 |  |  |  | 1.00 |  |  |
|  | Good | 1.68 | 1.07 | 2.65 |  | 1.59 | 1.37 | 1.84 |  | 0.95 | 0.68 | 1.34 |  | 1.50 | 1.30 | 1.73 |
|  | Fair | 2.72 | 1.66 | 4.46 |  | 2.68 | 2.26 | 3.16 |  | 1.44 | 0.98 | 2.12 |  | 2.54 | 2.17 | 2.98 |
|  | Bad | 3.01 | 1.52 | 5.95 |  | 3.24 | 2.52 | 4.16 |  | 1.10 | 0.56 | 2.16 |  | 2.82 | 2.21 | 3.59 |

OR = odds ratio; CI = confidence interval

Note. Model 1 included all demographic factors (sex, age, education level, equivalent income, marital status, living arrangement) and health status except depression.

Supplement table2

|  | | Physical abuse | | |  | Psychological abuse | | |  | Financial abuse | | |  | Any types of abuse | | |
| --- | --- | --- | --- | --- | --- | --- | --- | --- | --- | --- | --- | --- | --- | --- | --- | --- |
| OR | 95% CI | |  | OR | 95% CI | |  | OR | 95% CI | |  | OR | 95% CI | |
| Sex | |  |  |  |  |  |  |  |  |  |  |  |  |  |  |  |
|  | Male | 1.00 |  |  |  | 1.00 |  |  |  | 1.00 |  |  |  | 1.00 |  |  |
|  | Female | 2.86 | 2.22 | 3.67 |  | 1.59 | 1.47 | 1.73 |  | 0.44 | 0.35 | 0.55 |  | 1.46 | 1.35 | 1.58 |
| Age group | |  |  |  |  |  |  |  |  |  |  |  |  |  |  |  |
|  | 65-69 | 1.00 |  |  |  | 1.00 |  |  |  | 1.00 |  |  |  | 1.00 |  |  |
|  | 70-74 | 1.18 | 0.89 | 1.57 |  | 0.96 | 0.87 | 1.07 |  | 1.05 | 0.80 | 1.39 |  | 0.96 | 0.87 | 1.06 |
|  | 75-79 | 0.99 | 0.72 | 1.37 |  | 0.91 | 0.81 | 1.01 |  | 1.24 | 0.93 | 1.66 |  | 0.94 | 0.84 | 1.05 |
|  | 80-84 | 1.08 | 0.74 | 1.58 |  | 0.76 | 0.66 | 0.88 |  | 0.81 | 0.56 | 1.19 |  | 0.75 | 0.65 | 0.86 |
|  | ≧85 | 0.46 | 0.22 | 0.93 |  | 0.71 | 0.59 | 0.87 |  | 1.17 | 0.75 | 1.85 |  | 0.74 | 0.61 | 0.89 |
| Education level | |  |  |  |  |  |  |  |  |  |  |  |  |  |  |  |
|  | ≦9 | 1.00 |  |  |  | 1.00 |  |  |  | 1.00 |  |  |  | 1.00 |  |  |
|  | ≧10 | 0.85 | 0.68 | 1.07 |  | 1.07 | 0.99 | 1.16 |  | 0.89 | 0.72 | 1.10 |  | 1.04 | 0.96 | 1.13 |
| Equivalent income | |  |  |  |  |  |  |  |  |  |  |  |  |  |  |  |
|  | Low (≦199) | 1.00 |  |  |  | 1.00 |  |  |  | 1.00 |  |  |  | 1.00 |  |  |
|  | Mid (200-399) | 0.79 | 0.59 | 1.06 |  | 1.04 | 0.94 | 1.14 |  | 0.74 | 0.58 | 0.96 |  | 1.00 | 0.91 | 1.09 |
|  | High (≧400) | 0.91 | 0.57 | 1.46 |  | 1.09 | 0.94 | 1.27 |  | 0.56 | 0.35 | 0.89 |  | 1.02 | 0.89 | 1.18 |
| Marital status | |  |  |  |  |  |  |  |  |  |  |  |  |  |  |  |
|  | Married | 1.00 |  |  |  | 1.00 |  |  |  | 1.00 |  |  |  | 1.00 |  |  |
|  | Widowed | 0.43 | 0.29 | 0.63 |  | 0.66 | 0.58 | 0.76 |  | 0.82 | 0.57 | 1.19 |  | 0.68 | 0.60 | 0.77 |
|  | Separated | 0.62 | 0.29 | 1.31 |  | 0.83 | 0.64 | 1.07 |  | 0.83 | 0.42 | 1.63 |  | 0.83 | 0.65 | 1.06 |
|  | Unmarried | 0.90 | 0.41 | 2.02 |  | 0.80 | 0.59 | 1.07 |  | 0.83 | 0.38 | 1.79 |  | 0.85 | 0.65 | 1.12 |
| Living arrangement | |  |  |  |  |  |  |  |  |  |  |  |  |  |  |  |
|  | Living alone | 1.00 |  |  |  | 1.00 |  |  |  | 1.00 |  |  |  | 1.00 |  |  |
|  | With family members | 2.42 | 1.40 | 4.19 |  | 2.52 | 2.07 | 3.07 |  | 1.28 | 0.83 | 1.99 |  | 2.39 | 1.99 | 2.87 |
|  | Other facilities | 2.73 | 1.46 | 5.11 |  | 2.37 | 1.86 | 3.02 |  | 1.22 | 0.70 | 2.13 |  | 2.26 | 1.80 | 2.83 |
| Necessity of daily support | |  |  |  |  |  |  |  |  |  |  |  |  |  |  |  |
|  | Unnecessary | 1.00 |  |  |  | 1.00 |  |  |  | 1.00 |  |  |  | 1.00 |  |  |
|  | Necessary | 1.65 | 1.04 | 2.59 |  | 1.00 | 0.82 | 1.23 |  | 1.16 | 0.71 | 1.90 |  | 1.10 | 0.86 | 1.28 |
| Self-rated health | |  |  |  |  |  |  |  |  |  |  |  |  |  |  |  |
|  | Very good | 1.00 |  |  |  | 1.00 |  |  |  | 1.00 |  |  |  | 1.00 |  |  |
|  | Good | 1.34 | 0.85 | 2.13 |  | 1.36 | 1.17 | 1.58 |  | 0.85 | 0.60 | 1.20 |  | 1.29 | 1.12 | 1.49 |
|  | Fair | 1.36 | 0.81 | 2.28 |  | 1.61 | 1.35 | 1.91 |  | 0.99 | 0.66 | 1.50 |  | 1.56 | 1.32 | 1.84 |
|  | Bad | 1.23 | 0.61 | 2.51 |  | 1.66 | 1.28 | 2.15 |  | 0.66 | 0.33 | 1.32 |  | 1.47 | 1.14 | 1.89 |
| Geriatric depression scale | |  |  |  |  |  |  |  |  |  |  |  |  |  |  |  |
|  | Normal | 1.00 |  |  |  | 1.00 |  |  |  | 1.00 |  |  |  | 1.00 |  |  |
|  | Mild depression | 2.47 | 1.87 | 3.26 |  | 2.27 | 2.06 | 2.50 |  | 1.67 | 1.29 | 2.16 |  | 2.19 | 2.00 | 2.40 |
|  | Severe depression | 5.83 | 4.25 | 8.01 |  | 4.26 | 3.72 | 4.87 |  | 2.87 | 2.07 | 3.99 |  | 4.06 | 3.57 | 4.63 |

OR = odds ratio; CI = confidence interval

Note. Model 2 includes all variables in model 1 plus depression.
